# Supplementary material
Source: publisher figshare collection journal article supplement (https://acs.figshare.com/ndownloader/files/4252063)
Supplement: Supplementary file 1 [file 4252063]

data_General
_audit_creation_date                    2011-03-17
_audit_creation_method                 'by CrystalStructure 4.0'
_audit_update_record                    ?

#==============================================================================
_publ_author_name
;
Naruyoshi Komiya, Takako Muraoka, Masayuki Iida, Maiko Miyanaga, Koichi Takahashi, and Takeshi Naota
;
_publ_requested_journal               'J. Am. Chem. Soc.'

#==============================================================================
_publ_section_references
;
    ENTER OTHER REFERENCES

    Rigaku (2010). CrystalStructure. Version 4.0. 
    Rigaku Corporation, Tokyo, Japan.

    Sheldrick, G.M. (2008).
    Acta Cryst. A64, 112-122.
    SHELX97

    Rigaku (1999). NUMABS. 
    Rigaku Corporation, Tokyo, Japan.

;
#==============================================================================

data_anti-1c

#==============================================================================
# CHEMICAL DATA

_chemical_formula_sum                  'C42 H48 N4 O4 Pt2'
_chemical_formula_moiety               'C42 H48 N4 O4 Pt2'
_chemical_formula_weight                1063.05
_chemical_melting_point                 ?

#==============================================================================
# CRYSTAL DATA
_symmetry_cell_setting                  monoclinic
_symmetry_space_group_name_H-M         'P 1 21/c 1'
_symmetry_space_group_name_Hall        '-P 2ybc'
_symmetry_Int_Tables_number             14
loop_
_symmetry_equiv_pos_site_id
_symmetry_equiv_pos_as_xyz
1   '+X,+Y,+Z'
2   '-X,1/2+Y,1/2-Z'
3   '-X,-Y,-Z'
4   '+X,1/2-Y,1/2+Z'
#------------------------------------------------------------------------------
_cell_length_a                          9.796(3)
_cell_length_b                          19.219(6)
_cell_length_c                          20.060(6)
_cell_angle_alpha                       90.0000
_cell_angle_beta                        99.104(8)
_cell_angle_gamma                       90.0000
_cell_volume                            3729.0(18)
_cell_formula_units_Z                   4
_cell_measurement_reflns_used           8929
_cell_measurement_theta_min             2.99
_cell_measurement_theta_max             27.50
_cell_measurement_temperature           113
#------------------------------------------------------------------------------
_exptl_crystal_description              block
_exptl_crystal_colour                   orange
_exptl_crystal_size_max                 0.200
_exptl_crystal_size_mid                 0.200
_exptl_crystal_size_min                 0.100
_exptl_crystal_density_diffrn           1.893
_exptl_crystal_density_meas             ?
_exptl_crystal_density_method          'not measured'
_exptl_crystal_F_000                    2064.00
_exptl_absorpt_coefficient_mu           7.513
_exptl_absorpt_correction_type          numerical
_exptl_absorpt_process_details         'NUMABS (Rigaku, 1999)'
_exptl_absorpt_correction_T_min         0.309
_exptl_absorpt_correction_T_max         0.472

#==============================================================================
# EXPERIMENTAL DATA

_diffrn_ambient_temperature             113
_diffrn_radiation_type                 'Mo K\a'
_diffrn_radiation_wavelength            0.71075
_diffrn_measurement_device_type        'Rigaku R-AXIS RAPID'
_diffrn_measurement_method              \w
_diffrn_detector_area_resol_mean        10.000
_diffrn_reflns_number                   47624
_diffrn_reflns_av_R_equivalents         0.1199
_diffrn_reflns_theta_max                27.48
_diffrn_reflns_theta_full               27.49
_diffrn_measured_fraction_theta_max     0.996
_diffrn_measured_fraction_theta_full    0.996
_diffrn_reflns_limit_h_min             -12
_diffrn_reflns_limit_h_max              12
_diffrn_reflns_limit_k_min             -24
_diffrn_reflns_limit_k_max              24
_diffrn_reflns_limit_l_min             -24
_diffrn_reflns_limit_l_max              26
_diffrn_standards_number                0
_diffrn_standards_interval_count        .
_diffrn_standards_decay_%               ?

#==============================================================================
# REFINEMENT DATA

_refine_special_details
;
    Refinement was performed using all reflections. The weighted 
    R-factor (wR) and goodness of fit (S) are based on F^2^.
    R-factor (gt) are based on F. The threshold expression of
    F^2^ > 2.0 sigma(F^2^) is used only for calculating R-factor (gt).
;
_reflns_number_total                    8515
_reflns_number_gt                       5734
_reflns_threshold_expression            F^2^>2.0\s(F^2^)
_refine_ls_structure_factor_coef        Fsqd
_refine_ls_R_factor_gt                  0.0782
_refine_ls_wR_factor_ref                0.2478
_refine_ls_number_restraints            0
_refine_ls_hydrogen_treatment           constr
_refine_ls_number_reflns                8515
_refine_ls_number_parameters            469
_refine_ls_goodness_of_fit_ref          1.227
_refine_ls_weighting_scheme             calc
_refine_ls_weighting_details
           'w = 1/[\s^2^(Fo^2^)+(0.1213P)^2^+0.2000P] where P=(Fo^2^+2Fc^2^)/3'
_atom_sites_solution_hydrogens          geom
_atom_sites_solution_primary            direct
_atom_sites_solution_secondary          difmap
_refine_ls_shift/su_max                 0.004
_refine_diff_density_max                3.230
_refine_diff_density_min               -5.650
_refine_ls_extinction_method            none
_refine_ls_extinction_coef              ?

loop_
_atom_type_symbol
_atom_type_description
_atom_type_scat_dispersion_real
_atom_type_scat_dispersion_imag
_atom_type_scat_source
  'C' 'C'  0.0033 0.0016 
;
International Tables for Crystallography
(1992, Vol. C, Tables 4.2.6.8 and 6.1.1.4)
;
  'H' 'H'  0.0000 0.0000 
;
International Tables for Crystallography
(1992, Vol. C, Table 6.1.1.4)
;
  'N' 'N'  0.0061 0.0033 
;
International Tables for Crystallography
(1992, Vol. C, Tables 4.2.6.8 and 6.1.1.4)
;
  'O' 'O'  0.0106 0.0060 
;
International Tables for Crystallography
(1992, Vol. C, Tables 4.2.6.8 and 6.1.1.4)
;
  'Pt' 'Pt'  -1.7033 8.3905 
;
International Tables for Crystallography
(1992, Vol. C, Tables 4.2.6.8 and 6.1.1.4)
;

#==============================================================================
# ATOMIC COORDINATES AND THERMAL PARAMETERS

loop_
_atom_site_label
_atom_site_type_symbol
_atom_site_fract_x
_atom_site_fract_y
_atom_site_fract_z
_atom_site_U_iso_or_equiv
_atom_site_adp_type
_atom_site_occupancy
_atom_site_symmetry_multiplicity
_atom_site_calc_flag
_atom_site_refinement_flags
_atom_site_disorder_assembly
_atom_site_disorder_group
 Pt1 Pt 1.06850(5) 0.55002(3) 0.26317(2) 0.0352(2) Uani 1.0 4 d . . .
 Pt2 Pt 0.41895(5) 0.56683(3) 0.23923(2) 0.0347(2) Uani 1.0 4 d . . .
 O1 O 1.0279(9) 0.6398(5) 0.2152(5) 0.044(3) Uani 1.0 4 d . . .
 O2 O 1.1277(9) 0.4608(5) 0.3117(5) 0.047(3) Uani 1.0 4 d . . .
 O3 O 0.3950(9) 0.6578(4) 0.2848(4) 0.039(2) Uani 1.0 4 d . . .
 O4 O 0.4337(9) 0.4765(5) 0.1945(5) 0.045(3) Uani 1.0 4 d . . .
 N1 N 1.0686(10) 0.4985(6) 0.1762(6) 0.038(3) Uani 1.0 4 d . . .
 N2 N 1.0517(10) 0.6010(6) 0.3497(5) 0.038(3) Uani 1.0 4 d . . .
 N3 N 0.4611(9) 0.5170(5) 0.3288(5) 0.031(3) Uani 1.0 4 d . . .
 N4 N 0.3894(10) 0.6180(6) 0.1514(5) 0.036(3) Uani 1.0 4 d . . .
 C1 C 1.0441(12) 0.6033(7) 0.1037(7) 0.038(3) Uani 1.0 4 d . . .
 C2 C 1.0265(12) 0.6526(7) 0.1502(6) 0.037(3) Uani 1.0 4 d . . .
 C3 C 1.0106(13) 0.7223(7) 0.1290(7) 0.043(4) Uani 1.0 4 d . . .
 C4 C 1.0078(13) 0.7405(7) 0.0627(7) 0.049(4) Uani 1.0 4 d . . .
 C5 C 1.0235(14) 0.6904(7) 0.0149(7) 0.048(4) Uani 1.0 4 d . . .
 C6 C 1.0404(13) 0.6234(8) 0.0359(7) 0.048(4) Uani 1.0 4 d . . .
 C7 C 1.0598(13) 0.5282(7) 0.1178(7) 0.041(4) Uani 1.0 4 d . . .
 C8 C 1.0689(12) 0.4212(7) 0.1729(7) 0.043(4) Uani 1.0 4 d . . .
 C9 C 0.9253(13) 0.3926(7) 0.1490(7) 0.043(4) Uani 1.0 4 d . . .
 C10 C 0.8153(13) 0.4087(7) 0.1916(7) 0.044(4) Uani 1.0 4 d . . .
 C11 C 0.8314(13) 0.3703(7) 0.2596(6) 0.041(3) Uani 1.0 4 d . . .
 C12 C 0.7060(12) 0.3723(6) 0.2948(6) 0.036(3) Uani 1.0 4 d . . .
 C13 C 0.6610(12) 0.4450(6) 0.3125(7) 0.036(3) Uani 1.0 4 d . . .
 C14 C 0.5162(13) 0.4446(6) 0.3290(7) 0.043(4) Uani 1.0 4 d . . .
 C15 C 0.4049(12) 0.6142(7) 0.3986(7) 0.041(3) Uani 1.0 4 d . . .
 C16 C 0.3826(12) 0.6653(7) 0.3479(7) 0.039(3) Uani 1.0 4 d . . .
 C17 C 0.3476(14) 0.7323(7) 0.3688(8) 0.053(4) Uani 1.0 4 d . . .
 C18 C 0.3293(14) 0.7466(8) 0.4335(8) 0.057(4) Uani 1.0 4 d . . .
 C19 C 0.3457(13) 0.6945(8) 0.4819(7) 0.046(4) Uani 1.0 4 d . . .
 C20 C 0.3858(11) 0.6315(7) 0.4648(7) 0.039(3) Uani 1.0 4 d . . .
 C21 C 0.4461(14) 0.5451(7) 0.3857(8) 0.043(4) Uani 1.0 4 d . . .
 C22 C 1.1379(13) 0.5034(7) 0.4248(8) 0.043(4) Uani 1.0 4 d . . .
 C23 C 1.1574(12) 0.4533(7) 0.3768(7) 0.041(4) Uani 1.0 4 d . . .
 C24 C 1.2172(12) 0.3888(7) 0.3992(7) 0.047(4) Uani 1.0 4 d . . .
 C25 C 1.2548(13) 0.3766(7) 0.4675(7) 0.046(4) Uani 1.0 4 d . . .
 C26 C 1.2334(14) 0.4249(8) 0.5144(7) 0.052(4) Uani 1.0 4 d . . .
 C27 C 1.1739(13) 0.4868(8) 0.4924(7) 0.050(4) Uani 1.0 4 d . . .
 C28 C 1.0790(13) 0.5715(8) 0.4088(8) 0.049(4) Uani 1.0 4 d . . .
 C29 C 0.9952(13) 0.6723(6) 0.3462(7) 0.041(4) Uani 1.0 4 d . . .
 C30 C 0.8407(13) 0.6742(7) 0.3146(8) 0.047(4) Uani 1.0 4 d . . .
 C31 C 0.7973(12) 0.7470(6) 0.2937(6) 0.039(3) Uani 1.0 4 d . . .
 C32 C 0.6593(13) 0.7488(7) 0.2460(7) 0.047(4) Uani 1.0 4 d . . .
 C33 C 0.6524(14) 0.7105(7) 0.1820(6) 0.041(3) Uani 1.0 4 d . . .
 C34 C 0.5219(13) 0.7229(8) 0.1300(7) 0.047(4) Uani 1.0 4 d . . .
 C35 C 0.3882(13) 0.6945(6) 0.1484(7) 0.043(4) Uani 1.0 4 d . . .
 C36 C 0.3705(13) 0.5134(8) 0.0790(7) 0.043(4) Uani 1.0 4 d . . .
 C37 C 0.4012(13) 0.4630(8) 0.1294(7) 0.042(4) Uani 1.0 4 d . . .
 C38 C 0.4010(14) 0.3917(7) 0.1102(7) 0.046(4) Uani 1.0 4 d . . .
 C39 C 0.3638(13) 0.3740(8) 0.0426(8) 0.054(4) Uani 1.0 4 d . . .
 C40 C 0.3269(15) 0.4239(9) -0.0070(8) 0.054(4) Uani 1.0 4 d . . .
 C41 C 0.3337(12) 0.4923(9) 0.0113(7) 0.049(4) Uani 1.0 4 d . . .
 C42 C 0.3700(13) 0.5879(8) 0.0925(8) 0.051(4) Uani 1.0 4 d . . .
 H3 H 1.0016 0.7575 0.1612 0.0519 Uiso 1.0 4 calc R . .
 H4 H 0.9951 0.7878 0.0495 0.0586 Uiso 1.0 4 calc R . .
 H5 H 1.0226 0.7025 -0.0311 0.0572 Uiso 1.0 4 calc R . .
 H6 H 1.0501 0.5885 0.0034 0.0571 Uiso 1.0 4 calc R . .
 H7 H 1.0639 0.4987 0.0802 0.0495 Uiso 1.0 4 calc R . .
 H8A H 1.1044 0.4022 0.2182 0.0511 Uiso 1.0 4 calc R . .
 H8B H 1.1318 0.4059 0.1416 0.0511 Uiso 1.0 4 calc R . .
 H9A H 0.8934 0.4106 0.1029 0.0519 Uiso 1.0 4 calc R . .
 H9B H 0.9325 0.3414 0.1455 0.0519 Uiso 1.0 4 calc R . .
 H10A H 0.7240 0.3969 0.1654 0.0531 Uiso 1.0 4 calc R . .
 H10B H 0.8161 0.4594 0.2004 0.0531 Uiso 1.0 4 calc R . .
 H11A H 0.8542 0.3210 0.2520 0.0489 Uiso 1.0 4 calc R . .
 H11B H 0.9106 0.3907 0.2901 0.0489 Uiso 1.0 4 calc R . .
 H12A H 0.7260 0.3447 0.3369 0.0428 Uiso 1.0 4 calc R . .
 H12B H 0.6280 0.3496 0.2654 0.0428 Uiso 1.0 4 calc R . .
 H13A H 0.7255 0.4628 0.3518 0.0426 Uiso 1.0 4 calc R . .
 H13B H 0.6653 0.4766 0.2740 0.0426 Uiso 1.0 4 calc R . .
 H14A H 0.4558 0.4162 0.2952 0.0518 Uiso 1.0 4 calc R . .
 H14B H 0.5165 0.4234 0.3740 0.0518 Uiso 1.0 4 calc R . .
 H17 H 0.3363 0.7689 0.3366 0.0638 Uiso 1.0 4 calc R . .
 H18 H 0.3054 0.7923 0.4453 0.0680 Uiso 1.0 4 calc R . .
 H19 H 0.3287 0.7034 0.5264 0.0550 Uiso 1.0 4 calc R . .
 H20 H 0.4023 0.5968 0.4987 0.0467 Uiso 1.0 4 calc R . .
 H21 H 0.4651 0.5157 0.4242 0.0515 Uiso 1.0 4 calc R . .
 H24 H 1.2315 0.3541 0.3673 0.0560 Uiso 1.0 4 calc R . .
 H25 H 1.2965 0.3334 0.4820 0.0550 Uiso 1.0 4 calc R . .
 H26 H 1.2592 0.4159 0.5613 0.0625 Uiso 1.0 4 calc R . .
 H27 H 1.1565 0.5200 0.5251 0.0597 Uiso 1.0 4 calc R . .
 H28 H 1.0577 0.5979 0.4459 0.0590 Uiso 1.0 4 calc R . .
 H29A H 1.0486 0.7016 0.3189 0.0497 Uiso 1.0 4 calc R . .
 H29B H 1.0063 0.6921 0.3922 0.0497 Uiso 1.0 4 calc R . .
 H30A H 0.8249 0.6431 0.2748 0.0562 Uiso 1.0 4 calc R . .
 H30B H 0.7840 0.6570 0.3479 0.0562 Uiso 1.0 4 calc R . .
 H31A H 0.8694 0.7686 0.2710 0.0467 Uiso 1.0 4 calc R . .
 H31B H 0.7895 0.7749 0.3344 0.0467 Uiso 1.0 4 calc R . .
 H32A H 0.5873 0.7300 0.2705 0.0568 Uiso 1.0 4 calc R . .
 H32B H 0.6358 0.7981 0.2352 0.0568 Uiso 1.0 4 calc R . .
 H33A H 0.6591 0.6601 0.1923 0.0498 Uiso 1.0 4 calc R . .
 H33B H 0.7340 0.7232 0.1612 0.0498 Uiso 1.0 4 calc R . .
 H34A H 0.5109 0.7737 0.1227 0.0566 Uiso 1.0 4 calc R . .
 H34B H 0.5363 0.7019 0.0867 0.0566 Uiso 1.0 4 calc R . .
 H35A H 0.3746 0.7134 0.1928 0.0518 Uiso 1.0 4 calc R . .
 H35B H 0.3097 0.7101 0.1144 0.0518 Uiso 1.0 4 calc R . .
 H38 H 0.4260 0.3567 0.1432 0.0549 Uiso 1.0 4 calc R . .
 H39 H 0.3637 0.3263 0.0300 0.0653 Uiso 1.0 4 calc R . .
 H40 H 0.2975 0.4107 -0.0526 0.0650 Uiso 1.0 4 calc R . .
 H41 H 0.3131 0.5268 -0.0227 0.0585 Uiso 1.0 4 calc R . .
 H42 H 0.3538 0.6177 0.0543 0.0609 Uiso 1.0 4 calc R . .


loop_
_atom_site_aniso_label
_atom_site_aniso_U_11
_atom_site_aniso_U_22
_atom_site_aniso_U_33
_atom_site_aniso_U_12
_atom_site_aniso_U_13
_atom_site_aniso_U_23
 Pt1 0.0325(3) 0.0333(4) 0.0386(4) 0.00110(18) 0.0016(3) 0.00036(19)
 Pt2 0.0320(3) 0.0346(4) 0.0374(4) -0.00075(18) 0.0047(3) 0.00195(19)
 O1 0.053(6) 0.039(5) 0.040(6) -0.004(5) 0.012(5) -0.000(4)
 O2 0.055(6) 0.032(5) 0.049(6) -0.001(5) -0.002(5) -0.001(5)
 O3 0.057(6) 0.035(5) 0.029(5) -0.005(4) 0.021(4) 0.006(4)
 O4 0.044(5) 0.053(6) 0.039(6) -0.008(5) 0.015(4) 0.012(5)
 N1 0.037(6) 0.035(6) 0.043(7) 0.004(5) 0.006(5) 0.005(5)
 N2 0.039(6) 0.038(6) 0.034(6) -0.005(5) -0.003(5) 0.001(5)
 N3 0.033(5) 0.031(6) 0.031(6) -0.006(4) 0.010(5) -0.003(5)
 N4 0.036(6) 0.042(7) 0.028(6) 0.005(5) -0.002(5) -0.004(5)
 C1 0.032(7) 0.046(8) 0.042(8) -0.001(6) 0.022(6) 0.007(6)
 C2 0.031(6) 0.059(9) 0.023(7) 0.003(6) 0.015(5) 0.004(6)
 C3 0.047(8) 0.045(8) 0.039(8) 0.011(6) 0.007(6) -0.003(6)
 C4 0.046(8) 0.041(8) 0.058(10) 0.005(6) 0.004(7) 0.012(7)
 C5 0.069(10) 0.045(9) 0.031(8) 0.006(7) 0.017(7) 0.013(6)
 C6 0.043(8) 0.056(9) 0.046(9) -0.006(7) 0.012(7) 0.009(7)
 C7 0.040(7) 0.038(8) 0.044(9) 0.009(6) 0.001(6) -0.019(7)
 C8 0.032(7) 0.038(8) 0.062(10) 0.002(6) 0.020(7) 0.000(7)
 C9 0.049(8) 0.035(7) 0.045(8) 0.000(6) 0.005(7) -0.002(6)
 C10 0.038(7) 0.039(8) 0.054(9) 0.003(6) 0.000(7) -0.007(7)
 C11 0.040(7) 0.033(7) 0.050(9) 0.005(6) 0.007(6) -0.006(6)
 C12 0.041(7) 0.031(7) 0.038(8) 0.014(6) 0.014(6) -0.008(6)
 C13 0.035(7) 0.043(8) 0.032(7) 0.003(5) 0.015(6) 0.004(6)
 C14 0.047(8) 0.029(7) 0.051(9) -0.009(6) 0.001(7) 0.009(6)
 C15 0.037(7) 0.037(8) 0.049(9) 0.011(6) 0.010(6) -0.012(6)
 C16 0.033(7) 0.041(8) 0.044(8) -0.012(6) 0.010(6) -0.002(6)
 C17 0.050(8) 0.036(8) 0.070(11) 0.004(6) -0.003(8) -0.011(7)
 C18 0.056(9) 0.041(9) 0.071(11) -0.005(7) 0.004(8) -0.022(8)
 C19 0.040(7) 0.062(10) 0.035(8) 0.003(7) 0.004(6) -0.004(7)
 C20 0.031(7) 0.043(8) 0.043(8) -0.002(6) 0.006(6) -0.001(6)
 C21 0.048(8) 0.031(7) 0.048(9) -0.010(6) 0.003(7) 0.009(6)
 C22 0.033(7) 0.042(8) 0.051(9) -0.003(6) 0.003(7) 0.008(7)
 C23 0.027(7) 0.054(9) 0.039(8) -0.008(6) 0.002(6) 0.007(7)
 C24 0.032(7) 0.044(8) 0.063(10) -0.011(6) 0.005(7) 0.014(7)
 C25 0.042(8) 0.048(9) 0.050(9) 0.011(6) 0.014(7) 0.004(7)
 C26 0.050(9) 0.074(11) 0.032(8) -0.010(8) 0.004(7) 0.017(8)
 C27 0.037(8) 0.068(11) 0.045(9) 0.003(7) 0.010(7) 0.004(8)
 C28 0.026(7) 0.049(9) 0.070(11) 0.001(6) -0.002(7) -0.006(8)
 C29 0.052(8) 0.028(7) 0.040(8) 0.007(6) -0.007(7) -0.006(6)
 C30 0.038(7) 0.039(8) 0.062(10) -0.003(6) 0.004(7) -0.007(7)
 C31 0.044(7) 0.032(7) 0.042(8) 0.002(6) 0.012(6) -0.016(6)
 C32 0.039(7) 0.036(8) 0.066(10) 0.002(6) 0.004(7) -0.009(7)
 C33 0.055(8) 0.039(8) 0.033(7) 0.008(6) 0.014(6) -0.007(6)
 C34 0.046(8) 0.051(9) 0.040(8) -0.003(7) -0.006(7) -0.002(7)
 C35 0.039(7) 0.030(7) 0.058(9) -0.002(6) 0.004(7) 0.001(6)
 C36 0.031(7) 0.052(9) 0.049(9) -0.002(6) 0.012(6) -0.006(7)
 C37 0.034(7) 0.057(9) 0.038(8) -0.001(6) 0.012(6) -0.002(7)
 C38 0.055(8) 0.045(8) 0.041(8) -0.007(7) 0.018(7) 0.003(7)
 C39 0.040(8) 0.051(10) 0.073(11) 0.008(7) 0.013(8) -0.031(8)
 C40 0.046(9) 0.070(11) 0.046(9) 0.003(8) 0.007(7) -0.023(8)
 C41 0.029(7) 0.090(12) 0.030(8) 0.001(7) 0.011(6) -0.016(8)
 C42 0.039(8) 0.048(9) 0.062(10) -0.005(7) -0.002(7) 0.017(8)

#==============================================================================
_computing_data_collection             'RAPID AUTO (Rigaku, ????)'
_computing_cell_refinement             'RAPID AUTO'
_computing_data_reduction              'RAPID AUTO'
_computing_structure_solution          'SHELXS97 (Sheldrick, 2008)'
_computing_structure_refinement        'SHELXL97 (Sheldrick, 2008)'
_computing_publication_material        'CrystalStructure 4.0 (Rigaku, 2010)'
_computing_molecular_graphics          'CrystalStructure 4.0'

#==============================================================================
# MOLECULAR GEOMETRY

_geom_special_details
;
    ENTER SPECIAL DETAILS OF THE MOLECULAR GEOMETRY
;

loop_
_geom_bond_atom_site_label_1
_geom_bond_atom_site_label_2
_geom_bond_distance
_geom_bond_publ_flag
_geom_bond_site_symmetry_1
_geom_bond_site_symmetry_2
Pt1 O1 1.985(9) yes . .
Pt1 O2 2.011(9) yes . .
Pt1 N1 2.006(11) yes . .
Pt1 N2 2.022(11) yes . .
Pt2 O3 2.004(8) yes . .
Pt2 O4 1.971(9) yes . .
Pt2 N3 2.020(10) yes . .
Pt2 N4 1.999(10) yes . .
O1 C2 1.325(15) yes . .
O2 C23 1.301(16) yes . .
O3 C16 1.298(16) yes . .
O4 C37 1.319(16) yes . .
N1 C7 1.295(18) yes . .
N1 C8 1.488(16) yes . .
N2 C28 1.305(19) yes . .
N2 C29 1.474(15) yes . .
N3 C14 1.493(15) yes . .
N3 C21 1.293(18) yes . .
N4 C35 1.471(16) yes . .
N4 C42 1.302(18) yes . .
C1 C2 1.360(19) yes . .
C1 C6 1.41(2) yes . .
C1 C7 1.474(19) yes . .
C2 C3 1.406(19) yes . .
C3 C4 1.37(2) yes . .
C4 C5 1.38(2) yes . .
C5 C6 1.36(2) yes . .
C8 C9 1.516(17) yes . .
C9 C10 1.51(2) yes . .
C10 C11 1.537(18) yes . .
C11 C12 1.511(18) yes . .
C12 C13 1.524(17) yes . .
C13 C14 1.506(19) yes . .
C15 C16 1.406(19) yes . .
C15 C20 1.410(19) yes . .
C15 C21 1.422(19) yes . .
C16 C17 1.413(19) yes . .
C17 C18 1.36(3) yes . .
C18 C19 1.39(2) yes . .
C19 C20 1.333(19) yes . .
C22 C23 1.40(2) yes . .
C22 C27 1.38(2) yes . .
C22 C28 1.445(19) yes . .
C23 C24 1.412(19) yes . .
C24 C25 1.382(19) yes . .
C25 C26 1.36(2) yes . .
C26 C27 1.37(2) yes . .
C29 C30 1.546(17) yes . .
C30 C31 1.504(17) yes . .
C31 C32 1.527(16) yes . .
C32 C33 1.472(18) yes . .
C33 C34 1.536(17) yes . .
C34 C35 1.517(19) yes . .
C36 C37 1.40(2) yes . .
C36 C41 1.409(19) yes . .
C36 C42 1.46(2) yes . .
C37 C38 1.42(2) yes . .
C38 C39 1.39(2) yes . .
C39 C40 1.39(2) yes . .
C40 C41 1.36(3) yes . .
C3 H3 0.950 no . .
C4 H4 0.950 no . .
C5 H5 0.950 no . .
C6 H6 0.950 no . .
C7 H7 0.950 no . .
C8 H8A 0.990 no . .
C8 H8B 0.990 no . .
C9 H9A 0.990 no . .
C9 H9B 0.990 no . .
C10 H10A 0.990 no . .
C10 H10B 0.990 no . .
C11 H11A 0.990 no . .
C11 H11B 0.990 no . .
C12 H12A 0.990 no . .
C12 H12B 0.990 no . .
C13 H13A 0.990 no . .
C13 H13B 0.990 no . .
C14 H14A 0.990 no . .
C14 H14B 0.990 no . .
C17 H17 0.950 no . .
C18 H18 0.950 no . .
C19 H19 0.950 no . .
C20 H20 0.950 no . .
C21 H21 0.950 no . .
C24 H24 0.950 no . .
C25 H25 0.950 no . .
C26 H26 0.950 no . .
C27 H27 0.950 no . .
C28 H28 0.950 no . .
C29 H29A 0.990 no . .
C29 H29B 0.990 no . .
C30 H30A 0.990 no . .
C30 H30B 0.990 no . .
C31 H31A 0.990 no . .
C31 H31B 0.990 no . .
C32 H32A 0.990 no . .
C32 H32B 0.990 no . .
C33 H33A 0.990 no . .
C33 H33B 0.990 no . .
C34 H34A 0.990 no . .
C34 H34B 0.990 no . .
C35 H35A 0.990 no . .
C35 H35B 0.990 no . .
C38 H38 0.950 no . .
C39 H39 0.950 no . .
C40 H40 0.950 no . .
C41 H41 0.950 no . .
C42 H42 0.950 no . .

loop_
_geom_angle_atom_site_label_1
_geom_angle_atom_site_label_2
_geom_angle_atom_site_label_3
_geom_angle
_geom_angle_publ_flag
_geom_angle_site_symmetry_1
_geom_angle_site_symmetry_2
_geom_angle_site_symmetry_3
O1 Pt1 O2 174.9(4) yes . . .
O1 Pt1 N1 92.0(4) yes . . .
O1 Pt1 N2 87.5(4) yes . . .
O2 Pt1 N1 87.7(4) yes . . .
O2 Pt1 N2 93.1(4) yes . . .
N1 Pt1 N2 175.4(4) yes . . .
O3 Pt2 O4 177.4(4) yes . . .
O3 Pt2 N3 91.7(4) yes . . .
O3 Pt2 N4 87.8(4) yes . . .
O4 Pt2 N3 88.2(4) yes . . .
O4 Pt2 N4 92.5(4) yes . . .
N3 Pt2 N4 176.5(4) yes . . .
Pt1 O1 C2 127.5(8) yes . . .
Pt1 O2 C23 125.6(9) yes . . .
Pt2 O3 C16 125.3(8) yes . . .
Pt2 O4 C37 126.8(9) yes . . .
Pt1 N1 C7 124.1(9) yes . . .
Pt1 N1 C8 122.2(9) yes . . .
C7 N1 C8 113.6(11) yes . . .
Pt1 N2 C28 122.5(9) yes . . .
Pt1 N2 C29 119.4(8) yes . . .
C28 N2 C29 118.0(11) yes . . .
Pt2 N3 C14 117.8(8) yes . . .
Pt2 N3 C21 123.5(9) yes . . .
C14 N3 C21 118.7(11) yes . . .
Pt2 N4 C35 121.8(8) yes . . .
Pt2 N4 C42 124.1(10) yes . . .
C35 N4 C42 114.1(11) yes . . .
C2 C1 C6 118.9(13) yes . . .
C2 C1 C7 124.9(13) yes . . .
C6 C1 C7 116.1(12) yes . . .
O1 C2 C1 124.2(12) yes . . .
O1 C2 C3 117.3(12) yes . . .
C1 C2 C3 118.4(12) yes . . .
C2 C3 C4 121.4(12) yes . . .
C3 C4 C5 120.5(13) yes . . .
C4 C5 C6 117.8(13) yes . . .
C1 C6 C5 122.9(13) yes . . .
N1 C7 C1 126.6(13) yes . . .
N1 C8 C9 111.6(10) yes . . .
C8 C9 C10 117.1(11) yes . . .
C9 C10 C11 115.0(11) yes . . .
C10 C11 C12 115.2(10) yes . . .
C11 C12 C13 114.8(10) yes . . .
C12 C13 C14 111.4(10) yes . . .
N3 C14 C13 110.4(10) yes . . .
C16 C15 C20 119.2(12) yes . . .
C16 C15 C21 122.5(13) yes . . .
C20 C15 C21 118.3(12) yes . . .
O3 C16 C15 126.8(12) yes . . .
O3 C16 C17 117.1(12) yes . . .
C15 C16 C17 116.1(13) yes . . .
C16 C17 C18 122.7(13) yes . . .
C17 C18 C19 120.1(13) yes . . .
C18 C19 C20 118.7(13) yes . . .
C15 C20 C19 123.1(12) yes . . .
N3 C21 C15 128.7(13) yes . . .
C23 C22 C27 118.3(13) yes . . .
C23 C22 C28 124.4(13) yes . . .
C27 C22 C28 117.2(14) yes . . .
O2 C23 C22 125.6(12) yes . . .
O2 C23 C24 115.6(12) yes . . .
C22 C23 C24 118.8(13) yes . . .
C23 C24 C25 119.8(13) yes . . .
C24 C25 C26 121.5(13) yes . . .
C25 C26 C27 118.3(13) yes . . .
C22 C27 C26 123.2(14) yes . . .
N2 C28 C22 127.8(14) yes . . .
N2 C29 C30 112.1(10) yes . . .
C29 C30 C31 110.6(10) yes . . .
C30 C31 C32 112.3(10) yes . . .
C31 C32 C33 116.6(11) yes . . .
C32 C33 C34 115.6(11) yes . . .
C33 C34 C35 115.9(11) yes . . .
N4 C35 C34 111.6(11) yes . . .
C37 C36 C41 119.5(14) yes . . .
C37 C36 C42 123.5(13) yes . . .
C41 C36 C42 117.0(13) yes . . .
O4 C37 C36 124.8(13) yes . . .
O4 C37 C38 116.5(12) yes . . .
C36 C37 C38 118.7(12) yes . . .
C37 C38 C39 119.3(13) yes . . .
C38 C39 C40 121.8(14) yes . . .
C39 C40 C41 118.6(14) yes . . .
C36 C41 C40 122.0(14) yes . . .
N4 C42 C36 127.0(14) yes . . .
C2 C3 H3 119.313 no . . .
C4 C3 H3 119.316 no . . .
C3 C4 H4 119.754 no . . .
C5 C4 H4 119.733 no . . .
C4 C5 H5 121.111 no . . .
C6 C5 H5 121.107 no . . .
C1 C6 H6 118.526 no . . .
C5 C6 H6 118.534 no . . .
N1 C7 H7 116.735 no . . .
C1 C7 H7 116.710 no . . .
N1 C8 H8A 109.305 no . . .
N1 C8 H8B 109.305 no . . .
C9 C8 H8A 109.319 no . . .
C9 C8 H8B 109.311 no . . .
H8A C8 H8B 107.973 no . . .
C8 C9 H9A 108.028 no . . .
C8 C9 H9B 108.029 no . . .
C10 C9 H9A 108.025 no . . .
C10 C9 H9B 108.020 no . . .
H9A C9 H9B 107.268 no . . .
C9 C10 H10A 108.526 no . . .
C9 C10 H10B 108.527 no . . .
C11 C10 H10A 108.539 no . . .
C11 C10 H10B 108.537 no . . .
H10A C10 H10B 107.519 no . . .
C10 C11 H11A 108.486 no . . .
C10 C11 H11B 108.472 no . . .
C12 C11 H11A 108.467 no . . .
C12 C11 H11B 108.470 no . . .
H11A C11 H11B 107.499 no . . .
C11 C12 H12A 108.574 no . . .
C11 C12 H12B 108.561 no . . .
C13 C12 H12A 108.560 no . . .
C13 C12 H12B 108.565 no . . .
H12A C12 H12B 107.558 no . . .
C12 C13 H13A 109.362 no . . .
C12 C13 H13B 109.367 no . . .
C14 C13 H13A 109.345 no . . .
C14 C13 H13B 109.352 no . . .
H13A C13 H13B 107.990 no . . .
N3 C14 H14A 109.585 no . . .
N3 C14 H14B 109.587 no . . .
C13 C14 H14A 109.571 no . . .
C13 C14 H14B 109.580 no . . .
H14A C14 H14B 108.122 no . . .
C16 C17 H17 118.646 no . . .
C18 C17 H17 118.649 no . . .
C17 C18 H18 119.938 no . . .
C19 C18 H18 119.930 no . . .
C18 C19 H19 120.641 no . . .
C20 C19 H19 120.628 no . . .
C15 C20 H20 118.464 no . . .
C19 C20 H20 118.473 no . . .
N3 C21 H21 115.652 no . . .
C15 C21 H21 115.662 no . . .
C23 C24 H24 120.123 no . . .
C25 C24 H24 120.116 no . . .
C24 C25 H25 119.234 no . . .
C26 C25 H25 119.216 no . . .
C25 C26 H26 120.856 no . . .
C27 C26 H26 120.858 no . . .
C22 C27 H27 118.398 no . . .
C26 C27 H27 118.402 no . . .
N2 C28 H28 116.083 no . . .
C22 C28 H28 116.080 no . . .
N2 C29 H29A 109.185 no . . .
N2 C29 H29B 109.175 no . . .
C30 C29 H29A 109.190 no . . .
C30 C29 H29B 109.178 no . . .
H29A C29 H29B 107.892 no . . .
C29 C30 H30A 109.524 no . . .
C29 C30 H30B 109.531 no . . .
C31 C30 H30A 109.541 no . . .
C31 C30 H30B 109.539 no . . .
H30A C30 H30B 108.085 no . . .
C30 C31 H31A 109.143 no . . .
C30 C31 H31B 109.139 no . . .
C32 C31 H31A 109.142 no . . .
C32 C31 H31B 109.142 no . . .
H31A C31 H31B 107.865 no . . .
C31 C32 H32A 108.137 no . . .
C31 C32 H32B 108.135 no . . .
C33 C32 H32A 108.141 no . . .
C33 C32 H32B 108.132 no . . .
H32A C32 H32B 107.316 no . . .
C32 C33 H33A 108.365 no . . .
C32 C33 H33B 108.383 no . . .
C34 C33 H33A 108.370 no . . .
C34 C33 H33B 108.373 no . . .
H33A C33 H33B 107.445 no . . .
C33 C34 H34A 108.307 no . . .
C33 C34 H34B 108.299 no . . .
C35 C34 H34A 108.312 no . . .
C35 C34 H34B 108.303 no . . .
H34A C34 H34B 107.397 no . . .
N4 C35 H35A 109.283 no . . .
N4 C35 H35B 109.305 no . . .
C34 C35 H35A 109.295 no . . .
C34 C35 H35B 109.301 no . . .
H35A C35 H35B 107.954 no . . .
C37 C38 H38 120.336 no . . .
C39 C38 H38 120.330 no . . .
C38 C39 H39 119.087 no . . .
C40 C39 H39 119.083 no . . .
C39 C40 H40 120.731 no . . .
C41 C40 H40 120.716 no . . .
C36 C41 H41 118.982 no . . .
C40 C41 H41 118.987 no . . .
N4 C42 H42 116.522 no . . .
C36 C42 H42 116.505 no . . .

loop_
_geom_torsion_atom_site_label_1
_geom_torsion_atom_site_label_2
_geom_torsion_atom_site_label_3
_geom_torsion_atom_site_label_4
_geom_torsion
_geom_torsion_publ_flag
_geom_torsion_site_symmetry_1
_geom_torsion_site_symmetry_2
_geom_torsion_site_symmetry_3
_geom_torsion_site_symmetry_4
O1 Pt1 N1 C7 6.9(8) no . . . .
O1 Pt1 N1 C8 -168.7(7) no . . . .
N1 Pt1 O1 C2 -8.6(7) no . . . .
O1 Pt1 N2 C28 -174.3(8) no . . . .
O1 Pt1 N2 C29 11.1(7) no . . . .
N2 Pt1 O1 C2 176.0(7) no . . . .
O2 Pt1 N1 C7 -168.0(8) no . . . .
O2 Pt1 N1 C8 16.4(7) no . . . .
N1 Pt1 O2 C23 176.6(8) no . . . .
O2 Pt1 N2 C28 0.6(8) no . . . .
O2 Pt1 N2 C29 -174.0(7) no . . . .
N2 Pt1 O2 C23 -7.9(8) no . . . .
O3 Pt2 N3 C14 -168.8(6) no . . . .
O3 Pt2 N3 C21 9.5(7) no . . . .
N3 Pt2 O3 C16 -13.3(7) no . . . .
O3 Pt2 N4 C35 11.0(7) no . . . .
O3 Pt2 N4 C42 -169.1(8) no . . . .
N4 Pt2 O3 C16 170.2(7) no . . . .
O4 Pt2 N3 C14 13.8(6) no . . . .
O4 Pt2 N3 C21 -168.0(7) no . . . .
N3 Pt2 O4 C37 170.8(8) no . . . .
O4 Pt2 N4 C35 -171.5(7) no . . . .
O4 Pt2 N4 C42 8.3(8) no . . . .
N4 Pt2 O4 C37 -12.6(8) no . . . .
Pt1 O1 C2 C1 4.9(16) no . . . .
Pt1 O1 C2 C3 -172.8(6) no . . . .
Pt1 O2 C23 C22 8.0(17) no . . . .
Pt1 O2 C23 C24 -170.4(6) no . . . .
Pt2 O3 C16 C15 10.7(16) no . . . .
Pt2 O3 C16 C17 -171.5(6) no . . . .
Pt2 O4 C37 C36 10.6(17) no . . . .
Pt2 O4 C37 C38 -170.8(6) no . . . .
Pt1 N1 C7 C1 -2.0(17) no . . . .
Pt1 N1 C8 C9 99.6(10) no . . . .
C7 N1 C8 C9 -76.4(13) no . . . .
C8 N1 C7 C1 173.9(10) no . . . .
Pt1 N2 C28 C22 7.2(17) no . . . .
Pt1 N2 C29 C30 66.9(11) no . . . .
C28 N2 C29 C30 -108.0(11) no . . . .
C29 N2 C28 C22 -178.1(10) no . . . .
Pt2 N3 C14 C13 69.3(10) no . . . .
Pt2 N3 C21 C15 -2.9(18) no . . . .
C14 N3 C21 C15 175.3(11) no . . . .
C21 N3 C14 C13 -109.0(12) no . . . .
Pt2 N4 C35 C34 103.6(10) no . . . .
Pt2 N4 C42 C36 -2.1(18) no . . . .
C35 N4 C42 C36 177.7(10) no . . . .
C42 N4 C35 C34 -76.2(12) no . . . .
C2 C1 C6 C5 1.7(18) no . . . .
C6 C1 C2 O1 179.9(10) no . . . .
C6 C1 C2 C3 -2.4(16) no . . . .
C2 C1 C7 N1 -4.9(19) no . . . .
C7 C1 C2 O1 3.4(19) no . . . .
C7 C1 C2 C3 -178.9(10) no . . . .
C6 C1 C7 N1 178.4(11) no . . . .
C7 C1 C6 C5 178.6(10) no . . . .
O1 C2 C3 C4 -179.9(9) no . . . .
C1 C2 C3 C4 2.2(17) no . . . .
C2 C3 C4 C5 -1.3(18) no . . . .
C3 C4 C5 C6 0.5(19) no . . . .
C4 C5 C6 C1 -0.8(19) no . . . .
N1 C8 C9 C10 -60.7(14) no . . . .
C8 C9 C10 C11 -71.3(14) no . . . .
C9 C10 C11 C12 -166.0(9) no . . . .
C10 C11 C12 C13 -60.5(13) no . . . .
C11 C12 C13 C14 164.0(9) no . . . .
C12 C13 C14 N3 -165.5(9) no . . . .
C16 C15 C20 C19 0.8(17) no . . . .
C20 C15 C16 O3 -179.6(10) no . . . .
C20 C15 C16 C17 2.6(16) no . . . .
C16 C15 C21 N3 -5(2) no . . . .
C21 C15 C16 O3 0.3(19) no . . . .
C21 C15 C16 C17 -177.5(10) no . . . .
C20 C15 C21 N3 175.3(12) no . . . .
C21 C15 C20 C19 -179.1(10) no . . . .
O3 C16 C17 C18 178.9(10) no . . . .
C15 C16 C17 C18 -3.2(17) no . . . .
C16 C17 C18 C19 0(2) no . . . .
C17 C18 C19 C20 3.2(18) no . . . .
C18 C19 C20 C15 -3.7(17) no . . . .
C23 C22 C27 C26 3.1(19) no . . . .
C27 C22 C23 O2 179.5(11) no . . . .
C27 C22 C23 C24 -2.1(18) no . . . .
C23 C22 C28 N2 -10(2) no . . . .
C28 C22 C23 O2 1(2) no . . . .
C28 C22 C23 C24 179.5(11) no . . . .
C27 C22 C28 N2 171.9(11) no . . . .
C28 C22 C27 C26 -178.4(11) no . . . .
O2 C23 C24 C25 178.7(10) no . . . .
C22 C23 C24 C25 0.1(17) no . . . .
C23 C24 C25 C26 1.2(18) no . . . .
C24 C25 C26 C27 -0(2) no . . . .
C25 C26 C27 C22 -2(2) no . . . .
N2 C29 C30 C31 -163.8(10) no . . . .
C29 C30 C31 C32 164.7(10) no . . . .
C30 C31 C32 C33 -59.4(15) no . . . .
C31 C32 C33 C34 -170.1(10) no . . . .
C32 C33 C34 C35 -68.5(15) no . . . .
C33 C34 C35 N4 -65.6(14) no . . . .
C37 C36 C41 C40 0.0(18) no . . . .
C41 C36 C37 O4 -178.4(11) no . . . .
C41 C36 C37 C38 3.1(18) no . . . .
C37 C36 C42 N4 -4(2) no . . . .
C42 C36 C37 O4 -0(2) no . . . .
C42 C36 C37 C38 -178.9(11) no . . . .
C41 C36 C42 N4 174.0(11) no . . . .
C42 C36 C41 C40 -178.1(10) no . . . .
O4 C37 C38 C39 178.2(10) no . . . .
C36 C37 C38 C39 -3.1(18) no . . . .
C37 C38 C39 C40 0(2) no . . . .
C38 C39 C40 C41 3(2) no . . . .
C39 C40 C41 C36 -3.1(19) no . . . .

loop_
_geom_contact_atom_site_label_1
_geom_contact_atom_site_label_2
_geom_contact_distance
_geom_contact_publ_flag
_geom_contact_site_symmetry_1
_geom_contact_site_symmetry_2
Pt1 C1 3.331(13) no . .
Pt1 C22 3.329(14) no . .
Pt1 C30 3.530(14) no . .
Pt2 C13 3.488(12) no . .
Pt2 C15 3.347(14) no . .
Pt2 C36 3.336(15) no . .
O1 C4 3.599(17) no . .
O1 C7 2.952(16) no . .
O1 C29 2.767(16) no . .
O1 C30 2.988(18) no . .
O1 C31 3.598(16) no . .
O2 C8 2.855(17) no . .
O2 C11 3.403(15) no . .
O2 C25 3.564(16) no . .
O2 C28 2.974(18) no . .
O3 C18 3.582(18) no . .
O3 C21 2.952(16) no . .
O3 C32 3.319(16) no . .
O3 C35 2.817(17) no . .
O4 C13 3.044(14) no . .
O4 C14 2.760(16) no . .
O4 C42 2.959(18) no . .
N1 C2 3.025(17) no . .
N1 C10 3.077(17) no . .
N2 C23 3.042(17) no . .
N3 C16 2.993(16) no . .
N4 C33 3.110(16) no . .
N4 C37 3.016(18) no . .
C1 C4 2.768(19) no . .
C2 C5 2.805(18) no . .
C3 C6 2.71(2) no . .
C7 C9 3.030(19) no . .
C8 C11 3.268(19) no . .
C10 C13 3.13(2) no . .
C13 C21 3.358(19) no . .
C15 C18 2.77(2) no . .
C16 C19 2.825(19) no . .
C17 C20 2.71(2) no . .
C22 C25 2.771(19) no . .
C23 C26 2.797(19) no . .
C24 C27 2.73(2) no . .
C28 C30 3.393(18) no . .
C30 C33 3.068(18) no . .
C32 C35 3.215(17) no . .
C34 C42 3.03(2) no . .
C36 C39 2.77(2) no . .
C37 C40 2.82(2) no . .
C38 C41 2.77(2) no . .
Pt1 Pt2 3.5555(12) no . 1_655
Pt2 Pt1 3.5555(12) no . 1_455
O2 N3 3.406(13) no . 1_655
O4 N1 3.563(13) no . 1_455
N1 O4 3.563(13) no . 1_655
N1 C37 3.596(17) no . 1_655
N2 C15 3.453(15) no . 1_655
N2 C16 3.475(16) no . 1_655
N3 O2 3.406(13) no . 1_455
N3 C23 3.491(16) no . 1_455
N4 C1 3.378(15) no . 1_455
C1 N4 3.378(15) no . 1_655
C1 C42 3.249(18) no . 1_655
C6 C42 3.320(18) no . 1_655
C7 C36 3.271(19) no . 1_655
C7 C37 3.544(18) no . 1_655
C7 C42 3.361(19) no . 1_655
C8 C37 3.592(19) no . 1_655
C15 N2 3.453(15) no . 1_455
C15 C22 3.477(19) no . 1_455
C15 C28 3.334(18) no . 1_455
C16 N2 3.475(16) no . 1_455
C17 C29 3.599(18) no . 1_455
C19 C34 3.565(18) no . 4_565
C20 C22 3.462(18) no . 1_455
C20 C25 3.571(16) no . 3_766
C20 C27 3.566(19) no . 1_455
C20 C28 3.249(16) no . 1_455
C21 C22 3.34(2) no . 1_455
C21 C23 3.315(19) no . 1_455
C21 C26 3.494(19) no . 3_766
C22 C15 3.477(19) no . 1_655
C22 C20 3.462(18) no . 1_655
C22 C21 3.34(2) no . 1_655
C23 N3 3.491(16) no . 1_655
C23 C21 3.315(19) no . 1_655
C25 C20 3.571(16) no . 3_766
C26 C21 3.494(19) no . 3_766
C27 C20 3.566(19) no . 1_655
C27 C27 3.505(18) no . 3_766
C27 C28 3.59(2) no . 3_766
C28 C15 3.334(18) no . 1_655
C28 C20 3.249(16) no . 1_655
C28 C27 3.59(2) no . 3_766
C29 C17 3.599(18) no . 1_655
C34 C19 3.565(18) no . 4_564
C36 C7 3.271(19) no . 1_455
C37 N1 3.596(17) no . 1_455
C37 C7 3.544(18) no . 1_455
C37 C8 3.592(19) no . 1_455
C41 C41 3.372(17) no . 3_665
C42 C1 3.249(18) no . 1_455
C42 C6 3.320(18) no . 1_455
C42 C7 3.361(19) no . 1_455
Pt1 H8A 3.0192 no . .
Pt1 H10B 3.1213 no . .
Pt1 H11B 3.5100 no . .
Pt1 H29A 3.1375 no . .
Pt1 H30A 3.0202 no . .
Pt2 H13B 2.9631 no . .
Pt2 H14A 3.1054 no . .
Pt2 H32A 3.5529 no . .
Pt2 H33A 3.2141 no . .
Pt2 H35A 2.9770 no . .
O1 H3 2.5038 no . .
O1 H29A 2.3754 no . .
O1 H30A 2.4770 no . .
O1 H31A 3.2144 no . .
O1 H33A 3.5902 no . .
O1 H33B 3.3237 no . .
O2 H8A 2.1686 no . .
O2 H8B 3.5765 no . .
O2 H10B 3.4844 no . .
O2 H11B 2.4963 no . .
O2 H24 2.4753 no . .
O3 H17 2.4811 no . .
O3 H32A 2.3939 no . .
O3 H33A 3.4137 no . .
O3 H35A 2.1152 no . .
O3 H35B 3.5345 no . .
O4 H10A 3.3591 no . .
O4 H12B 3.2763 no . .
O4 H13B 2.5580 no . .
O4 H14A 2.3098 no . .
O4 H38 2.5180 no . .
N1 H9A 2.6774 no . .
N1 H9B 3.3191 no . .
N1 H10B 2.7010 no . .
N2 H30A 2.6050 no . .
N2 H30B 2.8292 no . .
N3 H13A 2.7616 no . .
N3 H13B 2.5507 no . .
N4 H32A 3.5543 no . .
N4 H33A 2.7606 no . .
N4 H34A 3.3040 no . .
N4 H34B 2.6349 no . .
C1 H3 3.2314 no . .
C1 H5 3.2884 no . .
C2 H4 3.2752 no . .
C2 H6 3.2337 no . .
C2 H7 3.3208 no . .
C2 H29A 3.4857 no . .
C2 H30A 3.4263 no . .
C2 H33B 3.2093 no . .
C3 H5 3.2533 no . .
C3 H31A 3.4731 no . .
C3 H33B 2.8833 no . .
C4 H6 3.2040 no . .
C4 H33B 3.5895 no . .
C5 H3 3.2442 no . .
C6 H4 3.2069 no . .
C6 H7 2.5550 no . .
C7 H6 2.5586 no . .
C7 H8A 3.1368 no . .
C7 H8B 2.4793 no . .
C7 H9A 2.7762 no . .
C7 H10B 3.3831 no . .
C8 H7 2.3772 no . .
C8 H10A 3.3908 no . .
C8 H10B 2.7226 no . .
C8 H11A 3.4208 no . .
C8 H11B 3.0702 no . .
C9 H7 2.9148 no . .
C9 H11A 2.6654 no . .
C9 H11B 2.8574 no . .
C10 H8A 2.8005 no . .
C10 H8B 3.4056 no . .
C10 H12A 3.4027 no . .
C10 H12B 2.7768 no . .
C10 H13B 2.7138 no . .
C11 H8A 2.9872 no . .
C11 H9A 3.3848 no . .
C11 H9B 2.6918 no . .
C11 H13A 2.8758 no . .
C11 H13B 2.6569 no . .
C12 H10A 2.6717 no . .
C12 H10B 2.8632 no . .
C12 H14A 2.5941 no . .
C12 H14B 2.8047 no . .
C13 H10A 3.2436 no . .
C13 H10B 2.9197 no . .
C13 H11A 3.3852 no . .
C13 H11B 2.7597 no . .
C13 H21 3.4506 no . .
C14 H12A 2.7992 no . .
C14 H12B 2.5694 no . .
C14 H21 2.4633 no . .
C15 H17 3.2512 no . .
C15 H19 3.2685 no . .
C16 H18 3.2894 no . .
C16 H20 3.2781 no . .
C16 H21 3.2967 no . .
C16 H32A 2.9935 no . .
C16 H35A 3.2351 no . .
C17 H19 3.2441 no . .
C17 H32A 3.2969 no . .
C18 H20 3.1971 no . .
C19 H17 3.2355 no . .
C20 H18 3.1981 no . .
C20 H21 2.5336 no . .
C21 H13A 3.3235 no . .
C21 H13B 3.5902 no . .
C21 H14A 3.0822 no . .
C21 H14B 2.4618 no . .
C21 H20 2.5717 no . .
C22 H24 3.2783 no . .
C22 H26 3.2728 no . .
C23 H8A 3.2923 no . .
C23 H11B 2.9974 no . .
C23 H25 3.2720 no . .
C23 H27 3.2405 no . .
C23 H28 3.3206 no . .
C24 H11B 3.4246 no . .
C24 H26 3.2549 no . .
C25 H27 3.1966 no . .
C26 H24 3.2477 no . .
C27 H25 3.2025 no . .
C27 H28 2.5279 no . .
C28 H27 2.5364 no . .
C28 H29A 3.0702 no . .
C28 H29B 2.4326 no . .
C28 H30B 3.3807 no . .
C29 H28 2.4554 no . .
C29 H31A 2.5755 no . .
C29 H31B 2.8026 no . .
C30 H28 3.4382 no . .
C30 H32A 2.7217 no . .
C30 H32B 3.3511 no . .
C30 H33A 2.8063 no . .
C30 H33B 3.2316 no . .
C31 H3 3.5754 no . .
C31 H29A 2.5848 no . .
C31 H29B 2.8169 no . .
C31 H33A 2.8076 no . .
C31 H33B 2.6713 no . .
C32 H30A 2.6076 no . .
C32 H30B 2.8273 no . .
C32 H34A 2.7066 no . .
C32 H34B 3.3568 no . .
C32 H35A 2.9059 no . .
C33 H30A 2.6460 no . .
C33 H30B 3.5257 no . .
C33 H31A 2.7839 no . .
C33 H31B 3.3732 no . .
C33 H35A 2.7643 no . .
C33 H35B 3.4162 no . .
C34 H32A 2.7921 no . .
C34 H32B 2.6529 no . .
C34 H42 2.8851 no . .
C35 H32A 2.9596 no . .
C35 H32B 3.3977 no . .
C35 H33A 2.7415 no . .
C35 H33B 3.4013 no . .
C35 H42 2.3786 no . .
C36 H38 3.2866 no . .
C36 H40 3.2828 no . .
C37 H10A 3.3780 no . .
C37 H13B 3.5776 no . .
C37 H14A 3.4058 no . .
C37 H39 3.2836 no . .
C37 H41 3.2748 no . .
C37 H42 3.3310 no . .
C38 H10A 3.1842 no . .
C38 H40 3.2826 no . .
C39 H41 3.2225 no . .
C40 H38 3.2806 no . .
C41 H39 3.2192 no . .
C41 H42 2.5559 no . .
C42 H33A 3.4870 no . .
C42 H34B 2.7431 no . .
C42 H35A 3.1358 no . .
C42 H35B 2.4774 no . .
C42 H41 2.5739 no . .
H3 H4 2.3072 no . .
H3 H29A 3.3032 no . .
H3 H31A 2.7328 no . .
H3 H33B 2.7026 no . .
H4 H5 2.3459 no . .
H5 H6 2.3007 no . .
H6 H7 2.3035 no . .
H7 H8A 3.3037 no . .
H7 H8B 2.2095 no . .
H7 H9A 2.4709 no . .
H8A H9A 2.8530 no . .
H8A H9B 2.3563 no . .
H8A H10B 2.9997 no . .
H8A H11A 3.0700 no . .
H8A H11B 2.5690 no . .
H8A H24 3.1897 no . .
H8B H9A 2.3434 no . .
H8B H9B 2.3244 no . .
H9A H10A 2.2481 no . .
H9A H10B 2.3988 no . .
H9A H11A 3.5242 no . .
H9B H10A 2.3936 no . .
H9B H10B 2.8391 no . .
H9B H11A 2.4132 no . .
H9B H11B 3.0910 no . .
H10A H11A 2.4645 no . .
H10A H11B 2.8573 no . .
H10A H12A 3.5803 no . .
H10A H12B 2.5164 no . .
H10A H13B 2.7963 no . .
H10A H38 2.9847 no . .
H10B H11A 2.8574 no . .
H10B H11B 2.3038 no . .
H10B H12B 3.2111 no . .
H10B H13A 3.2971 no . .
H10B H13B 2.2718 no . .
H11A H12A 2.3146 no . .
H11A H12B 2.3396 no . .
H11A H13B 3.5811 no . .
H11B H12A 2.3388 no . .
H11B H12B 2.8462 no . .
H11B H13A 2.7301 no . .
H11B H13B 2.8914 no . .
H11B H24 3.3520 no . .
H12A H13A 2.2905 no . .
H12A H13B 2.8531 no . .
H12A H14A 2.9831 no . .
H12A H14B 2.7459 no . .
H12B H13A 2.8512 no . .
H12B H13B 2.4707 no . .
H12B H14A 2.2723 no . .
H12B H14B 2.9496 no . .
H12B H38 2.8995 no . .
H13A H14A 2.8500 no . .
H13A H14B 2.2914 no . .
H13A H21 3.2889 no . .
H13B H14A 2.4530 no . .
H13B H14B 2.8493 no . .
H13B H30A 3.5599 no . .
H14A H21 3.2066 no . .
H14A H38 3.2269 no . .
H14B H21 2.1400 no . .
H17 H18 2.2944 no . .
H17 H32A 3.0641 no . .
H17 H35A 3.1532 no . .
H18 H19 2.3459 no . .
H19 H20 2.2709 no . .
H20 H21 2.3090 no . .
H24 H25 2.3226 no . .
H25 H26 2.3140 no . .
H26 H27 2.3063 no . .
H27 H28 2.2839 no . .
H28 H29A 3.2239 no . .
H28 H29B 2.1252 no . .
H28 H30B 3.2666 no . .
H29A H30A 2.4967 no . .
H29A H30B 2.8752 no . .
H29A H31A 2.2644 no . .
H29A H31B 2.9610 no . .
H29B H30A 2.8761 no . .
H29B H30B 2.3187 no . .
H29B H31A 2.9742 no . .
H29B H31B 2.7580 no . .
H30A H31A 2.4546 no . .
H30A H31B 2.8454 no . .
H30A H32A 2.8562 no . .
H30A H32B 3.5316 no . .
H30A H33A 2.1520 no . .
H30A H33B 2.7786 no . .
H30B H31A 2.8444 no . .
H30B H31B 2.2831 no . .
H30B H32A 2.6737 no . .
H30B H33A 3.1667 no . .
H31A H32A 2.8604 no . .
H31A H32B 2.3567 no . .
H31A H33A 3.1706 no . .
H31A H33B 2.5391 no . .
H31B H32A 2.3469 no . .
H31B H32B 2.3402 no . .
H31B H33B 3.5719 no . .
H32A H33A 2.2601 no . .
H32A H33B 2.8090 no . .
H32A H34A 3.0586 no . .
H32A H35A 2.4179 no . .
H32B H33A 2.8084 no . .
H32B H33B 2.3778 no . .
H32B H34A 2.4371 no . .
H32B H34B 3.5119 no . .
H32B H35A 3.0389 no . .
H33A H34A 2.8610 no . .
H33A H34B 2.4042 no . .
H33A H35A 2.9703 no . .
H33B H34A 2.4035 no . .
H33B H34B 2.2886 no . .
H34A H35A 2.3875 no . .
H34A H35B 2.3034 no . .
H34A H42 3.5467 no . .
H34B H35A 2.8558 no . .
H34B H35B 2.3771 no . .
H34B H42 2.4224 no . .
H35A H42 3.3116 no . .
H35B H42 2.2275 no . .
H38 H39 2.3307 no . .
H39 H40 2.3357 no . .
H40 H41 2.3089 no . .
H41 H42 2.3230 no . .
O2 H14A 3.3918 no . 1_655
O4 H8B 3.2743 no . 1_455
N3 H26 3.4809 no . 3_766
C1 H35B 3.2942 no . 1_655
C1 H40 3.3519 no . 3_665
C1 H42 3.3497 no . 1_655
C2 H35A 3.5767 no . 1_655
C2 H35B 3.1718 no . 1_655
C3 H11A 3.1707 no . 2_755
C3 H12A 3.4777 no . 2_755
C3 H24 3.4779 no . 2_755
C3 H35A 3.5964 no . 1_655
C3 H35B 2.9993 no . 1_655
C4 H19 3.5062 no . 4_664
C4 H25 3.4702 no . 2_755
C4 H35B 3.0310 no . 1_655
C5 H9A 3.2585 no . 3_765
C5 H9B 3.3691 no . 3_765
C5 H18 3.3014 no . 4_664
C5 H19 3.5965 no . 4_664
C5 H29B 3.3242 no . 4_564
C5 H35B 3.1954 no . 1_655
C5 H42 3.4982 no . 1_655
C6 H7 3.3498 no . 3_765
C6 H9A 3.0281 no . 3_765
C6 H35B 3.3008 no . 1_655
C6 H40 3.4425 no . 3_665
C6 H41 3.5999 no . 1_655
C6 H42 3.0361 no . 1_655
C7 H6 3.3586 no . 3_765
C8 H6 3.5501 no . 3_765
C8 H31A 3.1648 no . 2_745
C8 H31B 3.1484 no . 2_745
C9 H5 3.0948 no . 3_765
C9 H6 3.1254 no . 3_765
C9 H17 3.5407 no . 2_645
C9 H18 3.3227 no . 2_645
C9 H31A 3.3588 no . 2_745
C9 H31B 3.5692 no . 2_745
C9 H41 3.5202 no . 3_665
C10 H17 3.0800 no . 2_645
C10 H18 3.5946 no . 2_645
C11 H3 3.0122 no . 2_745
C11 H17 3.0356 no . 2_645
C12 H17 3.2744 no . 2_645
C12 H34A 3.4584 no . 2_645
C12 H35A 3.1742 no . 2_645
C13 H27 3.5235 no . 3_766
C14 H20 3.5128 no . 3_666
C14 H24 3.4755 no . 1_455
C14 H32B 3.3465 no . 2_645
C14 H34A 3.4467 no . 2_645
C15 H26 3.3116 no . 3_766
C16 H29A 3.3059 no . 1_455
C17 H9B 3.4284 no . 2_655
C17 H10A 3.2900 no . 2_655
C17 H11A 3.3428 no . 2_655
C17 H12B 3.5485 no . 2_655
C17 H29A 3.0003 no . 1_455
C17 H29B 3.5342 no . 1_455
C17 H38 3.2958 no . 2_655
C18 H5 3.3421 no . 4_465
C18 H9B 3.3344 no . 2_655
C18 H10A 3.4969 no . 2_655
C18 H29A 3.4049 no . 1_455
C18 H29B 3.3113 no . 1_455
C18 H34B 3.5441 no . 4_565
C18 H39 3.3511 no . 2_655
C18 H42 3.5430 no . 4_565
C19 H25 3.5055 no . 3_766
C19 H28 3.3590 no . 1_455
C19 H29B 3.5210 no . 1_455
C19 H34A 3.0857 no . 4_565
C19 H34B 3.2602 no . 4_565
C19 H35B 3.2939 no . 4_565
C20 H14B 3.3934 no . 3_666
C20 H25 3.1974 no . 3_766
C20 H27 3.4587 no . 1_455
C20 H28 3.2417 no . 1_455
C21 H26 3.0088 no . 3_766
C22 H20 3.3028 no . 1_655
C22 H21 3.2162 no . 1_655
C22 H27 3.2316 no . 3_766
C23 H14B 3.5738 no . 1_655
C23 H21 3.2441 no . 1_655
C24 H3 3.4069 no . 2_745
C24 H4 3.1363 no . 2_745
C24 H14A 3.4098 no . 1_655
C24 H14B 3.1242 no . 1_655
C24 H21 3.4222 no . 1_655
C24 H33B 3.4651 no . 2_745
C24 H34A 3.5428 no . 2_745
C25 H4 2.9591 no . 2_745
C25 H14B 3.5239 no . 1_655
C25 H20 3.3594 no . 3_766
C25 H21 3.5661 no . 1_655
C26 H4 3.5628 no . 2_745
C26 H13A 3.4164 no . 3_766
C26 H21 3.5744 no . 1_655
C26 H21 3.2230 no . 3_766
C26 H28 3.1106 no . 3_766
C26 H30B 3.2070 no . 3_766
C27 H13A 3.2707 no . 3_766
C27 H20 3.0649 no . 1_655
C27 H21 3.3990 no . 1_655
C27 H27 3.2025 no . 3_766
C27 H28 3.1969 no . 3_766
C28 H20 3.4218 no . 1_655
C28 H26 3.4677 no . 3_766
C28 H27 3.3377 no . 3_766
C29 H5 3.4231 no . 4_565
C29 H9B 3.3248 no . 2_755
C30 H26 3.3042 no . 3_766
C31 H8A 3.1535 no . 2_755
C31 H8B 3.3476 no . 2_755
C31 H9B 3.2807 no . 2_755
C31 H38 3.4213 no . 2_655
C32 H12B 3.3940 no . 2_655
C32 H14A 3.4652 no . 2_655
C32 H24 3.3424 no . 2_755
C32 H38 3.2432 no . 2_655
C33 H24 3.2010 no . 2_755
C33 H40 3.5791 no . 3_665
C34 H12A 3.5100 no . 2_655
C34 H19 2.9428 no . 4_564
C34 H24 3.4857 no . 2_755
C35 H12A 3.1261 no . 2_655
C35 H12B 3.4625 no . 2_655
C35 H19 3.1179 no . 4_564
C36 H6 3.5678 no . 1_455
C36 H7 3.0207 no . 1_455
C36 H8B 3.4990 no . 1_455
C36 H41 3.5481 no . 3_665
C37 H7 3.3657 no . 1_455
C37 H8B 2.9045 no . 1_455
C38 H8B 2.8201 no . 1_455
C38 H17 3.5317 no . 2_645
C38 H31B 3.2282 no . 2_645
C39 H8B 3.3045 no . 1_455
C39 H18 3.5739 no . 2_645
C39 H34B 3.2573 no . 3_665
C40 H34B 3.2977 no . 3_665
C40 H42 3.5011 no . 3_665
C41 H6 3.3205 no . 1_455
C41 H7 3.1732 no . 1_455
C41 H9A 3.4738 no . 3_665
C41 H41 3.4508 no . 3_665
C42 H6 3.3526 no . 1_455
C42 H7 3.4293 no . 1_455
C42 H40 3.4746 no . 3_665
H3 C11 3.0122 no . 2_755
H3 C24 3.4069 no . 2_755
H3 H11A 2.3952 no . 2_755
H3 H11B 2.8255 no . 2_755
H3 H12A 3.1453 no . 2_755
H3 H24 2.9271 no . 2_755
H3 H35B 3.4236 no . 1_655
H4 C24 3.1363 no . 2_755
H4 C25 2.9591 no . 2_755
H4 C26 3.5628 no . 2_755
H4 H12A 3.4478 no . 2_755
H4 H19 3.3763 no . 4_664
H4 H24 3.2414 no . 2_755
H4 H25 2.9593 no . 2_755
H4 H28 3.1508 no . 4_564
H4 H29B 3.1965 no . 4_564
H4 H35B 3.4861 no . 1_655
H5 C9 3.0948 no . 3_765
H5 C18 3.3421 no . 4_664
H5 C29 3.4231 no . 4_564
H5 H8B 3.2383 no . 3_765
H5 H9A 2.8022 no . 3_765
H5 H9B 2.5485 no . 3_765
H5 H18 2.8851 no . 4_664
H5 H19 3.5349 no . 4_664
H5 H29A 3.5721 no . 4_564
H5 H29B 2.5325 no . 4_564
H5 H31B 3.2762 no . 4_564
H6 C7 3.3586 no . 3_765
H6 C8 3.5501 no . 3_765
H6 C9 3.1254 no . 3_765
H6 C36 3.5678 no . 1_655
H6 C41 3.3205 no . 1_655
H6 C42 3.3526 no . 1_655
H6 H6 3.5388 no . 3_765
H6 H7 2.5056 no . 3_765
H6 H8B 3.1647 no . 3_765
H6 H9A 2.2866 no . 3_765
H6 H9B 3.3061 no . 3_765
H6 H41 2.9569 no . 1_655
H6 H42 3.0402 no . 1_655
H7 C6 3.3498 no . 3_765
H7 C36 3.0207 no . 1_655
H7 C37 3.3657 no . 1_655
H7 C41 3.1732 no . 1_655
H7 C42 3.4293 no . 1_655
H7 H6 2.5056 no . 3_765
H7 H7 3.2627 no . 3_765
H7 H41 3.4793 no . 1_655
H8A C31 3.1535 no . 2_745
H8A H14A 3.5526 no . 1_655
H8A H31A 2.5854 no . 2_745
H8A H31B 2.9192 no . 2_745
H8A H32B 3.2549 no . 2_745
H8B O4 3.2743 no . 1_655
H8B C31 3.3476 no . 2_745
H8B C36 3.4990 no . 1_655
H8B C37 2.9045 no . 1_655
H8B C38 2.8201 no . 1_655
H8B C39 3.3045 no . 1_655
H8B H5 3.2383 no . 3_765
H8B H6 3.1647 no . 3_765
H8B H31A 3.1692 no . 2_745
H8B H31B 2.6550 no . 2_745
H8B H38 3.0285 no . 1_655
H9A C5 3.2585 no . 3_765
H9A C6 3.0281 no . 3_765
H9A C41 3.4738 no . 3_665
H9A H5 2.8022 no . 3_765
H9A H6 2.2866 no . 3_765
H9A H18 3.0480 no . 2_645
H9A H41 2.6635 no . 3_665
H9B C5 3.3691 no . 3_765
H9B C17 3.4284 no . 2_645
H9B C18 3.3344 no . 2_645
H9B C29 3.3248 no . 2_745
H9B C31 3.2807 no . 2_745
H9B H5 2.5485 no . 3_765
H9B H6 3.3061 no . 3_765
H9B H17 3.0498 no . 2_645
H9B H18 2.8795 no . 2_645
H9B H29A 2.7783 no . 2_745
H9B H29B 3.0505 no . 2_745
H9B H31A 2.7390 no . 2_745
H9B H31B 2.9774 no . 2_745
H10A C17 3.2900 no . 2_645
H10A C18 3.4969 no . 2_645
H10A H17 2.5300 no . 2_645
H10A H18 2.9759 no . 2_645
H10A H41 3.1850 no . 3_665
H10B H41 3.5991 no . 3_665
H11A C3 3.1707 no . 2_745
H11A C17 3.3428 no . 2_645
H11A H3 2.3952 no . 2_745
H11A H17 2.5681 no . 2_645
H11A H29A 2.9369 no . 2_745
H11A H31A 2.9915 no . 2_745
H11A H35A 3.3640 no . 2_645
H11B H3 2.8255 no . 2_745
H11B H31A 3.5336 no . 2_745
H12A C3 3.4777 no . 2_745
H12A C34 3.5100 no . 2_645
H12A C35 3.1261 no . 2_645
H12A H3 3.1453 no . 2_745
H12A H4 3.4478 no . 2_745
H12A H19 3.0210 no . 3_666
H12A H34A 2.9161 no . 2_645
H12A H35A 2.7395 no . 2_645
H12A H35B 2.8068 no . 2_645
H12B C17 3.5485 no . 2_645
H12B C32 3.3940 no . 2_645
H12B C35 3.4625 no . 2_645
H12B H17 2.6342 no . 2_645
H12B H32A 3.1244 no . 2_645
H12B H32B 2.7652 no . 2_645
H12B H34A 3.1603 no . 2_645
H12B H35A 2.7505 no . 2_645
H12B H35B 3.5936 no . 2_645
H13A C26 3.4164 no . 3_766
H13A C27 3.2707 no . 3_766
H13A H26 2.9010 no . 3_766
H13A H27 2.5763 no . 3_766
H14A O2 3.3918 no . 1_455
H14A C24 3.4098 no . 1_455
H14A C32 3.4652 no . 2_645
H14A H8A 3.5526 no . 1_455
H14A H24 3.0579 no . 1_455
H14A H32B 2.4815 no . 2_645
H14A H34A 3.1858 no . 2_645
H14B C20 3.3934 no . 3_666
H14B C23 3.5738 no . 1_455
H14B C24 3.1242 no . 1_455
H14B C25 3.5239 no . 1_455
H14B H19 3.3569 no . 3_666
H14B H20 2.5809 no . 3_666
H14B H24 3.0770 no . 1_455
H14B H32B 3.4330 no . 2_645
H14B H34A 2.8904 no . 2_645
H17 C9 3.5407 no . 2_655
H17 C10 3.0800 no . 2_655
H17 C11 3.0356 no . 2_655
H17 C12 3.2744 no . 2_655
H17 C38 3.5317 no . 2_655
H17 H9B 3.0498 no . 2_655
H17 H10A 2.5300 no . 2_655
H17 H11A 2.5681 no . 2_655
H17 H12B 2.6342 no . 2_655
H17 H29A 3.0699 no . 1_455
H17 H38 2.8525 no . 2_655
H18 C5 3.3014 no . 4_465
H18 C9 3.3227 no . 2_655
H18 C10 3.5946 no . 2_655
H18 C39 3.5739 no . 2_655
H18 H5 2.8851 no . 4_465
H18 H9A 3.0480 no . 2_655
H18 H9B 2.8795 no . 2_655
H18 H10A 2.9759 no . 2_655
H18 H29B 3.5269 no . 1_455
H18 H34B 3.3370 no . 4_565
H18 H35B 3.3849 no . 4_565
H18 H39 3.2667 no . 2_655
H18 H41 3.5331 no . 4_565
H18 H42 2.7685 no . 4_565
H19 C4 3.5062 no . 4_465
H19 C5 3.5965 no . 4_465
H19 C34 2.9428 no . 4_565
H19 C35 3.1179 no . 4_565
H19 H4 3.3763 no . 4_465
H19 H5 3.5349 no . 4_465
H19 H12A 3.0210 no . 3_666
H19 H14B 3.3569 no . 3_666
H19 H28 3.5234 no . 1_455
H19 H34A 2.4530 no . 4_565
H19 H34B 2.8516 no . 4_565
H19 H35B 2.4527 no . 4_565
H19 H42 3.4867 no . 4_565
H20 C14 3.5128 no . 3_666
H20 C22 3.3028 no . 1_455
H20 C25 3.3594 no . 3_766
H20 C27 3.0649 no . 1_455
H20 C28 3.4218 no . 1_455
H20 H14B 2.5809 no . 3_666
H20 H21 2.8493 no . 3_666
H20 H25 3.2082 no . 3_766
H20 H27 2.9417 no . 1_455
H20 H28 3.3747 no . 1_455
H20 H34A 3.5602 no . 4_565
H21 C22 3.2162 no . 1_455
H21 C23 3.2441 no . 1_455
H21 C24 3.4222 no . 1_455
H21 C25 3.5661 no . 1_455
H21 C26 3.5744 no . 1_455
H21 C26 3.2230 no . 3_766
H21 C27 3.3990 no . 1_455
H21 H20 2.8493 no . 3_666
H21 H21 3.0714 no . 3_666
H21 H26 2.9760 no . 3_766
H24 C3 3.4779 no . 2_745
H24 C14 3.4755 no . 1_655
H24 C32 3.3424 no . 2_745
H24 C33 3.2010 no . 2_745
H24 C34 3.4857 no . 2_745
H24 H3 2.9271 no . 2_745
H24 H4 3.2414 no . 2_745
H24 H14A 3.0579 no . 1_655
H24 H14B 3.0770 no . 1_655
H24 H31A 3.2407 no . 2_745
H24 H32B 2.8152 no . 2_745
H24 H33B 2.6122 no . 2_745
H24 H34A 2.9380 no . 2_745
H25 C4 3.4702 no . 2_745
H25 C19 3.5055 no . 3_766
H25 C20 3.1974 no . 3_766
H25 H4 2.9593 no . 2_745
H25 H20 3.2082 no . 3_766
H25 H33B 3.5431 no . 2_745
H25 H34A 3.2463 no . 2_745
H25 H34B 3.4187 no . 2_745
H25 H39 3.2539 no . 4_655
H26 N3 3.4809 no . 3_766
H26 C15 3.3116 no . 3_766
H26 C21 3.0088 no . 3_766
H26 C28 3.4677 no . 3_766
H26 C30 3.3042 no . 3_766
H26 H13A 2.9010 no . 3_766
H26 H21 2.9760 no . 3_766
H26 H28 3.0959 no . 3_766
H26 H29B 3.5647 no . 3_766
H26 H30B 2.3881 no . 3_766
H27 C13 3.5235 no . 3_766
H27 C20 3.4587 no . 1_655
H27 C22 3.2316 no . 3_766
H27 C27 3.2025 no . 3_766
H27 C28 3.3377 no . 3_766
H27 H13A 2.5763 no . 3_766
H27 H20 2.9417 no . 1_655
H27 H27 3.1667 no . 3_766
H27 H28 3.2038 no . 3_766
H28 C19 3.3590 no . 1_655
H28 C20 3.2417 no . 1_655
H28 C26 3.1106 no . 3_766
H28 C27 3.1969 no . 3_766
H28 H4 3.1508 no . 4_565
H28 H19 3.5234 no . 1_655
H28 H20 3.3747 no . 1_655
H28 H26 3.0959 no . 3_766
H28 H27 3.2038 no . 3_766
H29A C16 3.3059 no . 1_655
H29A C17 3.0003 no . 1_655
H29A C18 3.4049 no . 1_655
H29A H5 3.5721 no . 4_565
H29A H9B 2.7783 no . 2_755
H29A H11A 2.9369 no . 2_755
H29A H17 3.0699 no . 1_655
H29B C5 3.3242 no . 4_565
H29B C17 3.5342 no . 1_655
H29B C18 3.3113 no . 1_655
H29B C19 3.5210 no . 1_655
H29B H4 3.1965 no . 4_565
H29B H5 2.5325 no . 4_565
H29B H9B 3.0505 no . 2_755
H29B H18 3.5269 no . 1_655
H29B H26 3.5647 no . 3_766
H30B C26 3.2070 no . 3_766
H30B H26 2.3881 no . 3_766
H31A C8 3.1648 no . 2_755
H31A C9 3.3588 no . 2_755
H31A H8A 2.5854 no . 2_755
H31A H8B 3.1692 no . 2_755
H31A H9B 2.7390 no . 2_755
H31A H11A 2.9915 no . 2_755
H31A H11B 3.5336 no . 2_755
H31A H24 3.2407 no . 2_755
H31B C8 3.1484 no . 2_755
H31B C9 3.5692 no . 2_755
H31B C38 3.2282 no . 2_655
H31B H5 3.2762 no . 4_565
H31B H8A 2.9192 no . 2_755
H31B H8B 2.6550 no . 2_755
H31B H9B 2.9774 no . 2_755
H31B H38 2.7255 no . 2_655
H31B H39 3.4536 no . 2_655
H32A H12B 3.1244 no . 2_655
H32A H38 3.0011 no . 2_655
H32B C14 3.3465 no . 2_655
H32B H8A 3.2549 no . 2_755
H32B H12B 2.7652 no . 2_655
H32B H14A 2.4815 no . 2_655
H32B H14B 3.4330 no . 2_655
H32B H24 2.8152 no . 2_755
H32B H38 2.8368 no . 2_655
H33A H40 3.2045 no . 3_665
H33B C24 3.4651 no . 2_755
H33B H24 2.6122 no . 2_755
H33B H25 3.5431 no . 2_755
H33B H40 3.3547 no . 3_665
H34A C12 3.4584 no . 2_655
H34A C14 3.4467 no . 2_655
H34A C19 3.0857 no . 4_564
H34A C24 3.5428 no . 2_755
H34A H12A 2.9161 no . 2_655
H34A H12B 3.1603 no . 2_655
H34A H14A 3.1858 no . 2_655
H34A H14B 2.8904 no . 2_655
H34A H19 2.4530 no . 4_564
H34A H20 3.5602 no . 4_564
H34A H24 2.9380 no . 2_755
H34A H25 3.2463 no . 2_755
H34B C18 3.5441 no . 4_564
H34B C19 3.2602 no . 4_564
H34B C39 3.2573 no . 3_665
H34B C40 3.2977 no . 3_665
H34B H18 3.3370 no . 4_564
H34B H19 2.8516 no . 4_564
H34B H25 3.4187 no . 2_755
H34B H39 2.7301 no . 3_665
H34B H40 2.8552 no . 3_665
H35A C2 3.5767 no . 1_455
H35A C3 3.5964 no . 1_455
H35A C12 3.1742 no . 2_655
H35A H11A 3.3640 no . 2_655
H35A H12A 2.7395 no . 2_655
H35A H12B 2.7505 no . 2_655
H35B C1 3.2942 no . 1_455
H35B C2 3.1718 no . 1_455
H35B C3 2.9993 no . 1_455
H35B C4 3.0310 no . 1_455
H35B C5 3.1954 no . 1_455
H35B C6 3.3008 no . 1_455
H35B C19 3.2939 no . 4_564
H35B H3 3.4236 no . 1_455
H35B H4 3.4861 no . 1_455
H35B H12A 2.8068 no . 2_655
H35B H12B 3.5936 no . 2_655
H35B H18 3.3849 no . 4_564
H35B H19 2.4527 no . 4_564
H38 C17 3.2958 no . 2_645
H38 C31 3.4213 no . 2_645
H38 C32 3.2432 no . 2_645
H38 H8B 3.0285 no . 1_455
H38 H17 2.8525 no . 2_645
H38 H31B 2.7255 no . 2_645
H38 H32A 3.0011 no . 2_645
H38 H32B 2.8368 no . 2_645
H39 C18 3.3511 no . 2_645
H39 H18 3.2667 no . 2_645
H39 H25 3.2539 no . 4_454
H39 H31B 3.4536 no . 2_645
H39 H34B 2.7301 no . 3_665
H40 C1 3.3519 no . 3_665
H40 C6 3.4425 no . 3_665
H40 C33 3.5791 no . 3_665
H40 C42 3.4746 no . 3_665
H40 H33A 3.2045 no . 3_665
H40 H33B 3.3547 no . 3_665
H40 H34B 2.8552 no . 3_665
H40 H42 3.4637 no . 3_665
H41 C6 3.5999 no . 1_455
H41 C9 3.5202 no . 3_665
H41 C36 3.5481 no . 3_665
H41 C41 3.4508 no . 3_665
H41 H6 2.9569 no . 1_455
H41 H7 3.4793 no . 1_455
H41 H9A 2.6635 no . 3_665
H41 H10A 3.1850 no . 3_665
H41 H10B 3.5991 no . 3_665
H41 H18 3.5331 no . 4_564
H42 C1 3.3497 no . 1_455
H42 C5 3.4982 no . 1_455
H42 C6 3.0361 no . 1_455
H42 C18 3.5430 no . 4_564
H42 C40 3.5011 no . 3_665
H42 H6 3.0402 no . 1_455
H42 H18 2.7685 no . 4_564
H42 H19 3.4867 no . 4_564
H42 H40 3.4637 no . 3_665

#==============================================================================

#==============================================================================
# Additional structures and associated data_? identifiers
# should be added at this point if there is more than one 
# structure analysis in the CIF.

#==============================================================================
#     End of CIF
#==============================================================================
